# Supplementary material for: Predicting transcription factor site occupancy using DNA sequence intrinsic and cell-type specific chromatin features
Source: PubMed Central journal article supplement (PMC4895346; doi:10.1186/s12859-015-0846-z), 2016-01-11
Supplement: 12859_2015_846_MOESM1_ESM.pdf [file 12859_2015_846_MOESM1_ESM.pdf]

Additional File 1: Details of samples used in the study. GEO and Jaspar ID are given.

Numbers in parenthesis indicates tags shift value used for the sample.

|                                    | <i>K562</i>     | <i>GM12878</i> | <i>HeLa-S3</i>  | <i>HepG2</i>   | <i>H1-hESC</i> |
|------------------------------------|-----------------|----------------|-----------------|----------------|----------------|
| <b>ENCODE tags</b>                 |                 |                |                 |                |                |
| CTCF                               | GSM733719 (112) | GSM733752 (95) | GSM733785 (113) | GSM733645 (84) | GSM733672 (76) |
| JunD                               | GSM935569 (58)  | GSM935541 (40) | GSM935328 (73)  | GSM935649 (69) | GSM935434 (62) |
| GABP                               | GSM803524 (72)  | GSM803356 (49) | GSM803454 (52)  | GSM803343 (47) | GSM803424 (63) |
| REST                               | GSM803440 (52)  | GSM803349 (41) | GSM803478 (60)  | GSM803344 (49) | GSM803365 (57) |
| USF2                               | GSM935356 (55)  | GSM935558 (69) | GSM935561 (72)  | GSM935646 (63) | GSM935380 (57) |
| <b>Histone marks (all factors)</b> |                 |                |                 |                |                |
| <i>H3K4me1</i>                     | GSM733692       |                |                 |                | GSM733782      |
| <i>H3K4me2</i>                     | GSM733651       | GSM733769      | GSM733734       | GSM733693      | GSM733670      |
| <i>H3K4me3</i>                     | GSM733680       | GSM733708      | GSM733682       | GSM733737      | GSM733657      |
| <i>H4K20me1</i>                    | GSM733675       | GSM733642      | GSM733689       | GSM733694      | GSM733687      |
| <i>H3K9ac</i>                      | GSM733778       | GSM733677      | GSM733756       | GSM733638      | GSM733773      |
| <i>K3K27ac</i>                     | GSM733656       | GSM733771      | GSM733684       | GSM733743      | GSM733718      |
| <i>H3K27me3</i>                    | GSM733658       | GSM733758      | GSM733696       | GSM733754      | GSM733748      |
| <i>H3K36me3</i>                    | GSM733714       | GSM733679      | GSM733711       | GSM733685      | GSM733725      |
| <b>Other chromatin marks</b>       |                 |                |                 |                |                |
| DGF                                | GSM736629       | GSM736496      | GSM736564       | GSM736637      | GSM736582      |
| Rad21                              | GSM803447 (46)  |                |                 |                | GSM803466 (66) |
| PolII                              | GSM803410 (60)  |                |                 |                | GSM803366 (72) |
| FOSL1                              | GSM803439 (63)  |                |                 |                | GSM803382 (55) |
| <b>TFBS</b>                        | CTCF -          | JunD           | GABPA -         | REST -         | USF2 -         |
| <b>(Jaspar ID)</b>                 | MA0139.1        | -MA0492.1      | MA0062.2        | MA0138.2       | MA0526.1       |
