# Supplementary material for: Predicting transcription factor site occupancy using DNA sequence intrinsic and cell-type specific chromatin features
Source: PubMed Central journal article supplement (PMC4895346; doi:10.1186/s12859-015-0846-z), 2016-01-11
Supplement: 12859_2015_846_MOESM2_ESM.pdf [file 12859_2015_846_MOESM2_ESM.pdf]

Additional File 2: Performance of various machine-learning algorithms to classify enriched and depleted CTCF sites (ENCODE peak list for K562 cell line) using multiple histone marks.

|          | SVM - RBF kernel | SVM – Polynomial kernel | Random forest (RF) |
|----------|------------------|-------------------------|--------------------|
| auROc    | 82.39            | 79.01                   | 81.52              |
| Time (s) | 1024.89          | 6127.795                | 566.916            |
